# Supplementary material for: A proposed approach to pulmonary long COVID: a viewpoint
Source: PubMed Central journal article supplement — Eur Respir J. 2024 Sep 12;64(3):2302302. doi: 10.1183/13993003.02302-2023 (PMC11391093; doi:10.1183/13993003.02302-2023), 2024-09-12

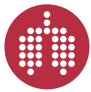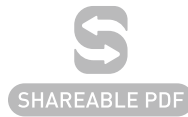

# A proposed approach to pulmonary long COVID: a viewpoint

Firoozeh V. Gerayeli<sup>1</sup>, Rachel L. Eddy<sup>1,2</sup> and Don D. Sin <sup>1,2</sup>

<sup>1</sup>Centre for Heart Lung Innovation, St. Paul's Hospital, Vancouver, BC, Canada. <sup>2</sup>Division of Respiratory Medicine, Department of Medicine, University of British Columbia, Vancouver, BC, Canada.

Corresponding author: Don D. Sin ([Don.Sin@hli.ubc.ca](mailto:Don.Sin@hli.ubc.ca))

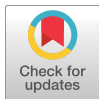

Shareable abstract (@ERSpublications)

**A majority of patients with pulmonary long COVID have small airway disease, characterised by inflammation, which can be diagnosed with traditional and emerging technologies** <https://bit.ly/48WceB3>

**Cite this article as:** Gerayeli FV, Eddy RL, Sin DD. A proposed approach to pulmonary long COVID: a viewpoint. *Eur Respir J* 2024; 64: 2302302 [DOI: 10.1183/13993003.02302-2023].

This extracted version can be shared freely online.

Copyright ©The authors 2024.

This version is distributed under the terms of the Creative Commons Attribution Non-Commercial Licence 4.0. For commercial reproduction rights and permissions contact [permissions@ersnet.org](mailto:permissions@ersnet.org)

Received: 22 Dec 2023  
Accepted: 2 Feb 2024

Long COVID (also known as “post-acute sequelae of COVID-19”) is a multi-system disorder that follows an acute bout of severe acute respiratory syndrome coronavirus 2 (SARS-CoV-2) infection [1]. Although its exact prevalence is unknown, it is estimated to affect approximately 10% of SARS-CoV-2-infected individuals, though in reality the proportion is likely much higher owing to under-reporting of cases [1]. The prevalence is elevated in patients who have had acute SARS-CoV-2 pneumonia requiring hospitalisation, and lower in those who have been previously vaccinated or were infected with the Omicron variant [1]. In approximately 6% of the cases of long COVID, pulmonary symptoms such as dyspnoea, cough and wheeziness are prominent, leading to considerable disability and morbidity [2, 3]. While it is attractive to view long COVID as one disease, it is likely a very complex, heterogeneous disorder, with multiple different phenotypes, each driven by a unique set of molecules and pathways [1]. Even within an organ system (*e.g.* the lungs), there is likely to be significant heterogeneity in the phenotypes of disease. Here, we hypothesise that patients with long COVID with a predominance of pulmonary symptoms (which we will refer to in this viewpoint editorial as “pulmonary long COVID”, or PLC) have airway pathology that can be detected using conventional as well as emerging technologies, and careful phenotyping of this condition will provide important insights on its mechanism(s) and reveal novel biomarkers and therapeutic solutions for millions around the world with PLC.

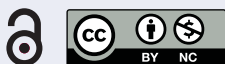

Supplement: ERJ-02302-2023.Shareable.pdf [file ERJ-02302-2023.Shareable.pdf]
